# Supplementary material
Source: ML conference proceedings conference paper supplement (https://openreview.net/forum?id=mWt8qqrIST1)

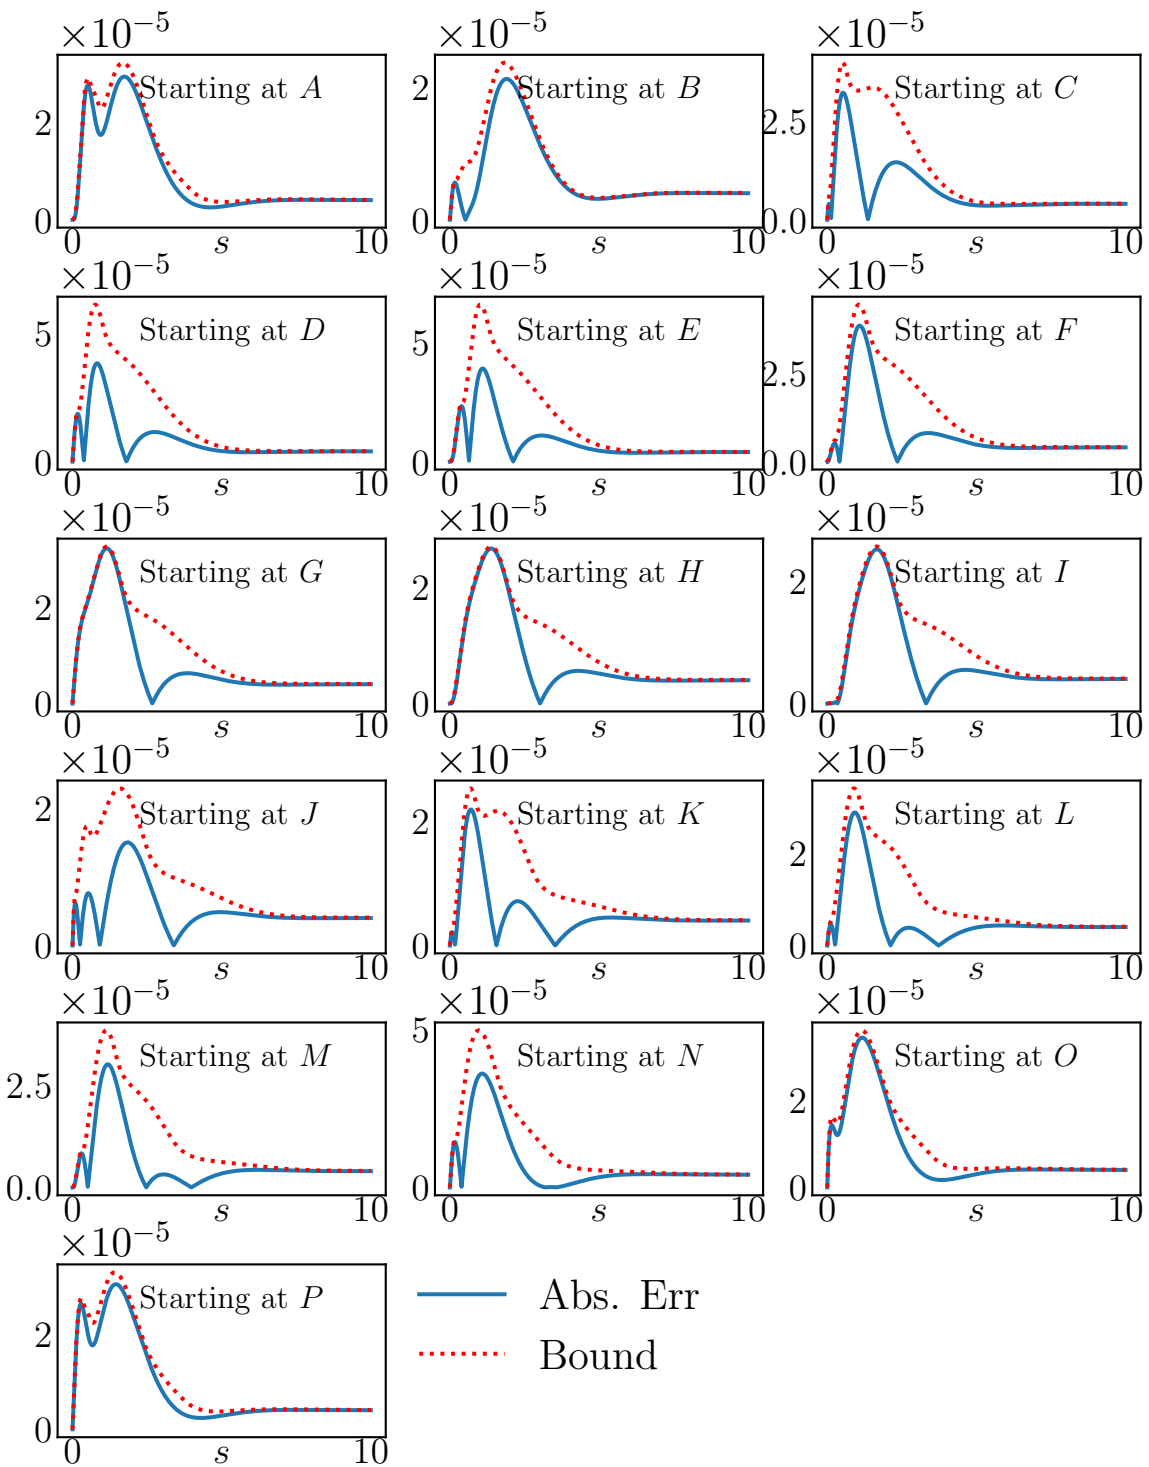

Supplement: supplementary_material [file attachment]

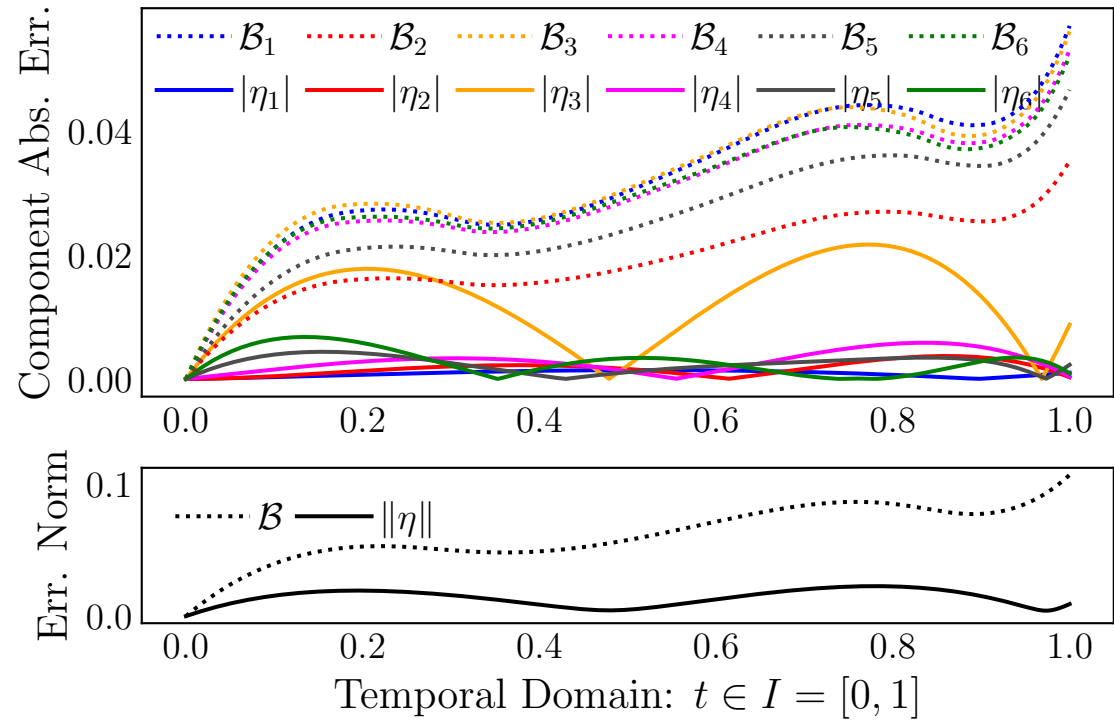

Supplement: supplementary_material [file attachment]

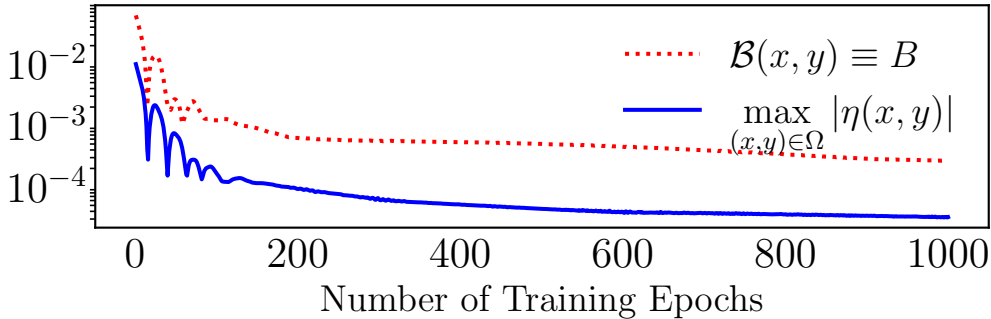

Supplement: supplementary_material [file attachment]

$$v'' + 3v' + 2v = f(t)$$

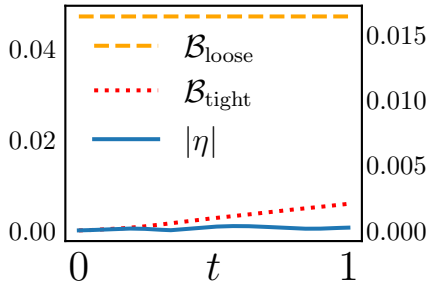

$$v'' + v = g(t)$$

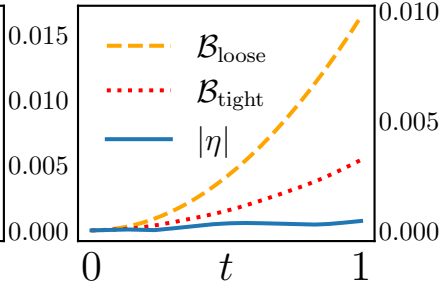

$$v'' - v' = h(t)$$

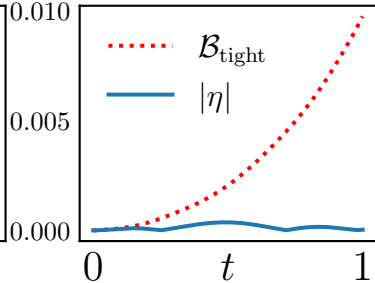

Supplement: supplementary_material [file attachment]

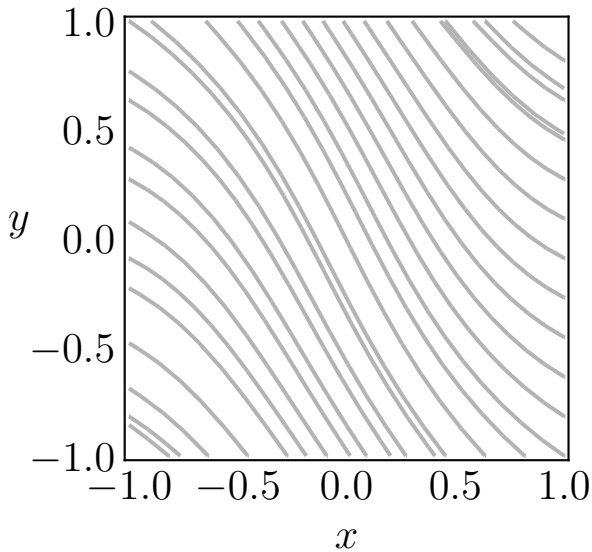

Supplement: supplementary_material [file attachment]

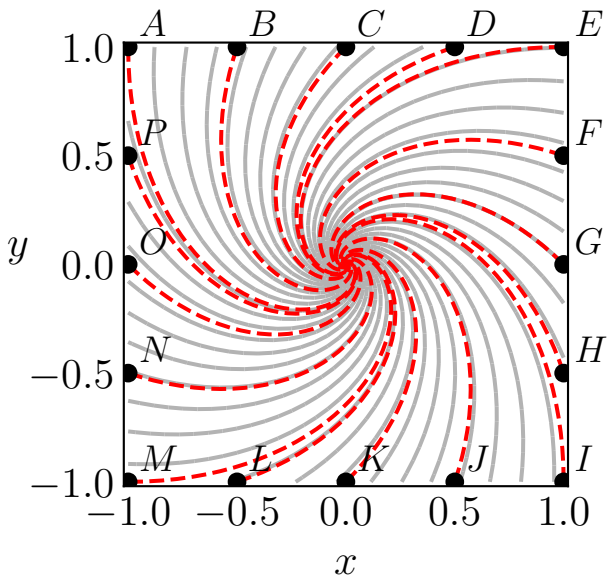

Supplement: supplementary_material [file attachment]

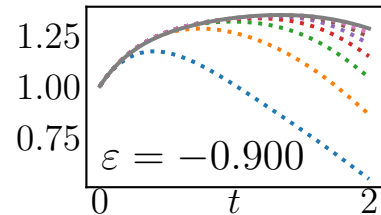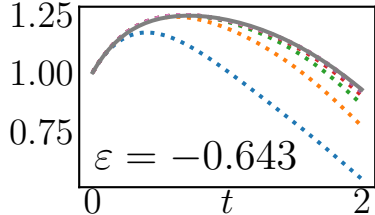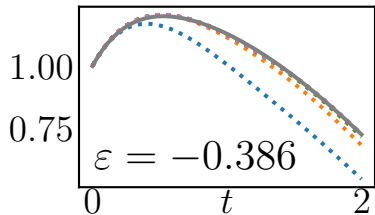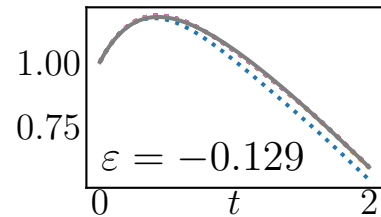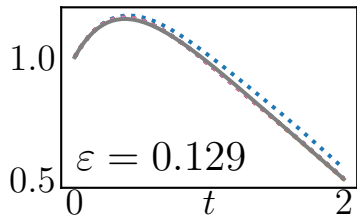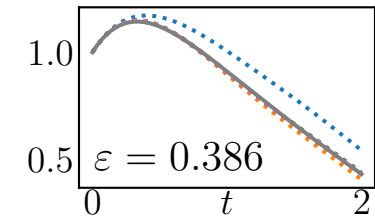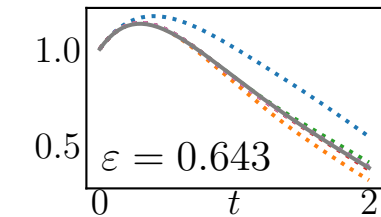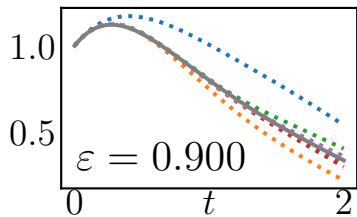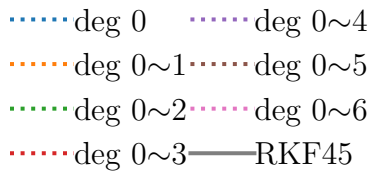

Supplement: supplementary_material [file attachment]

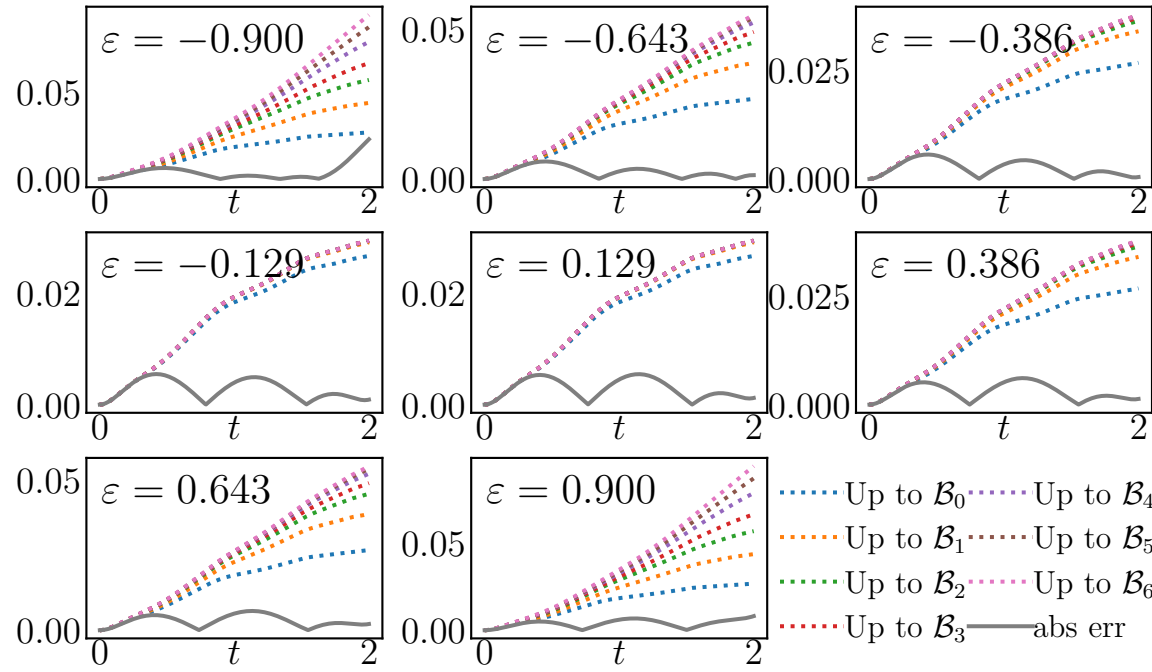

Supplement: supplementary_material [file attachment]
